# Supplementary material for: Severity of Hypertension as a Predictor of Initiation of Dialysis among Study Participants with and without Diabetes Mellitus
Source: HighWire-hosted journal article supplement (doi:10.1136/jim-2020-001489), 2020-12-23
Supplement: jim-2020-001489supp001_data_supplement.pdf [file jim-2020-001489supp001_data_supplement.pdf]

**Table S1.** Cumulative percentage of people with and without diabetes mellitus (DM) at each year of the follow-up period

| Year of the follow-up period (year) | DM (-) | DM (+) |
|-------------------------------------|--------|--------|
| ~ 3                                 | 0      | 0.7    |
| ~ 4                                 | 19.6   | 22.6   |
| ~ 5                                 | 56.9   | 56.5   |
| ~ 6                                 | 75.2   | 71.3   |
| ~ 7                                 | 80.2   | 76.8   |
| ~ 8                                 | 88.6   | 86.9   |
| ~ 10                                | 100    | 100    |

Cumulative percentage of dialysis (%) in participants with and without diabetes mellitus during each year of the follow-up period

**Table S2.** Number of study participants divided to two categories of systolic blood pressure according to presence or absence of diabetes and dialysis

| SBP mmHg | Diabetes mellitus (-) |                | Diabetes mellitus (+) |               |
|----------|-----------------------|----------------|-----------------------|---------------|
|          | Dialysis              |                | Dialysis              |               |
|          | (-)<br>(n=241515)     | (+)<br>(n=113) | (-)<br>(n=17170)      | (+)<br>(n=76) |
| ≥110     | 174599                | 94             | 15679                 | 73            |
| ≥115     | 144136                | 88             | 14446                 | 71            |
| ≥120     | 113999                | 74             | 12929                 | 66            |
| ≥125     | 81643                 | 63             | 10818                 | 61            |
| ≥130     | 54441                 | 49             | 8458                  | 50            |
| ≥140     | 19588                 | 30             | 4317                  | 30            |
| ≥150     | 7707                  | 19             | 2049                  | 19            |

**Table S3.** Number of study participants in five categories of systolic blood pressure according to presence or absence of diabetes and dialysis

| SBP mmHg | Diabetes mellitus (-) |                | Diabetes mellitus (+) |               |
|----------|-----------------------|----------------|-----------------------|---------------|
|          | Dialysis              |                | Dialysis              |               |
|          | (-)<br>(n=241515)     | (+)<br>(n=113) | (-)<br>(n=17170)      | (+)<br>(n=76) |
| ≤119     | 127516                | 39             | 4241                  | 10            |
| 120-129  | 59558                 | 25             | 4471                  | 16            |
| 130-139  | 34853                 | 19             | 4141                  | 20            |
| 140-149  | 11881                 | 11             | 2268                  | 11            |
| ≥150     | 7707                  | 19             | 2049                  | 19            |

**Table S4.** Characteristics of study participants according to presence or absence of diabetes and dialysis

|                                       | Total<br>(n=256633) | Diabetes mellitus (-) |                 | P-value        | Diabetes mellitus (+) |                | P-value        |
|---------------------------------------|---------------------|-----------------------|-----------------|----------------|-----------------------|----------------|----------------|
|                                       |                     | Dialysis              |                 |                | Dialysis              |                |                |
|                                       |                     | (-)<br>(n=241501)     | (+)<br>(n=113)  |                | (-)<br>(n=14963)      | (+)<br>(n=56)  |                |
| Age (years)                           | 45±9                | <b>44±9</b>           | <b>47±8</b>     | < <b>0.001</b> | 50±8                  | 51±7           | 0.344          |
| Sex (Male, %)                         | 159185 (62)         | <b>146590 (61)</b>    | <b>91 (81)</b>  | < <b>0.001</b> | <b>12450 (83)</b>     | <b>54 (96)</b> | <b>0.008</b>   |
| Body mass index (kg/m <sup>2</sup> )  | 22.8±3.6            | <b>22.6±3.4</b>       | <b>23.6±4.0</b> | <b>0.003</b>   | 26.0±4.6              | 26.8±4.8       | 0.111          |
| Smoking (%)                           | 70901 (28)          | <b>65358 (27)</b>     | <b>44 (39)</b>  | <b>0.005</b>   | 5477 (37)             | 22 (39)        | 0.678          |
| Systolic blood pressure (mmHg)        | 120±16              | <b>119±15</b>         | <b>129±21</b>   | < <b>0.001</b> | <b>130±17</b>         | <b>141±22</b>  | <b>0.001</b>   |
| Diastolic blood pressure (mmHg)       | 74±11               | <b>73±11</b>          | <b>79±15</b>    | < <b>0.001</b> | <b>80±11</b>          | <b>84±12</b>   | <b>0.005</b>   |
| FPG (mmol/L)                          | 5.2±1.0             | <b>5.1±0.5</b>        | <b>5.2±0.6</b>  | <b>0.005</b>   | 7.9±2.4               | 8.3±2.9        | 0.267          |
| HbA1c (%)                             | 5.5±0.6             | 5.4±0.3               | 5.5±0.4         | 0.243          | 7.1±1.4               | 7.5±1.8        | 0.161          |
| LDL cholesterol (mmol/L)              | 3.1±0.8             | 3.1±0.8               | 3.0±0.9         | 0.469          | 3.3±0.9               | 3.4±1.2        | 0.421          |
| HDL cholesterol (mmol/L)              | 1.6±0.4             | <b>1.7±0.4</b>        | <b>1.4±0.4</b>  | < <b>0.001</b> | <b>1.4±0.4</b>        | <b>1.2±0.3</b> | < <b>0.001</b> |
| TG (mmol/L)                           | 1.2±0.9             | <b>1.2±0.9</b>        | <b>1.6±1.1</b>  | < <b>0.001</b> | <b>1.7±1.4</b>        | <b>2.5±2.0</b> | < <b>0.001</b> |
| Medication for diabetes (%)           | 6930 (3)            | -                     | -               | -              | <b>6890 (46)</b>      | <b>40 (71)</b> | < <b>0.001</b> |
| Medication for hypertension (%)       | 20389 (8)           | <b>15776 (7)</b>      | <b>51 (45)</b>  | < <b>0.001</b> | <b>4517 (30)</b>      | <b>45 (80)</b> | < <b>0.001</b> |
| Prevalence of coronary artery disease | 12699 (5)           | <b>10601 (4)</b>      | <b>37 (33)</b>  | < <b>0.001</b> | <b>2007 (13)</b>      | <b>24 (43)</b> | < <b>0.001</b> |

HbA1c: glycated hemoglobin A1c; LDL cholesterol: low-density lipoprotein cholesterol; HDL cholesterol: high-density lipoprotein cholesterol; TG: triglyceride; FPG: fasting plasma glucose

Data are presented as numbers, means ± standard deviations, or percentages.

**Table S5.** Results of sensitivity analysis**A. Sex**

| SBP mmHg   | DM (-)                      |                            | DM (+)                     |                          |
|------------|-----------------------------|----------------------------|----------------------------|--------------------------|
|            | men                         | women                      | men                        | women                    |
|            | (n=146693)<br>(dialysis=91) | (n=94935)<br>(dialysis=22) | (n=14314)<br>(dialysis=71) | (n=2932)<br>(dialysis=5) |
|            | HR (95% CI)                 |                            |                            |                          |
| <110/ ≥110 | 0.81 (0.45-1.48)            | 1.62 (0.55-4.80)           | 1.91 (0.46-7.89)           | 0.37 (0.03-4.43)         |
| <115/ ≥115 | 1.12 (0.66-1.90)            | 2.25(0.80-6.34)            | 2.12 (0.76-5.86)           | 0.71(0.06-7.98)          |
| <120/ ≥120 | 0.98 (0.62-1.56)            | 2.36 (0.87-6.35)           | 1.56 (0.77-3.18)           | 1.39 (0.13-14.3)         |
| <125/ ≥125 | 1.19 (0.76-1.85)            | 2.62 (0.98-7.00)           | 1.70 (0.94-3.10)           | 2.68 (0.24-29.5)         |
| <130/ ≥130 | 1.07 (0.68-1.68)            | <b>4.80 (1.78-13.0)</b>    | 1.39 (0.84-2.30)           | 6.05 (0.50-73.6)         |
| <140/ ≥140 | 1.55 (0.92-2.59)            | <b>7.91 (2.76-22.7)</b>    | 1.48 (0.91-2.42)           | 1.83 (0.24-13.9)         |
| <150/ ≥150 | <b>2.45 (1.35-4.45)</b>     | <b>5.50 (1.71-17.7)</b>    | <b>1.90 (1.10-3.28)</b>    | 1.75 (0.18-17.6)         |

**B. Age**

| SBP mmHg   | DM (-)                      |                             | DM (+)                    |                            |
|------------|-----------------------------|-----------------------------|---------------------------|----------------------------|
|            | < 45 years old              | ≥ 45 years old              | < 45 years old            | ≥ 45 years old             |
|            | (n=127958)<br>(dialysis=41) | (n=113670)<br>(dialysis=72) | (n=4249)<br>(dialysis=13) | (n=12997)<br>(dialysis=63) |
|            | HR (95% CI)                 |                             |                           |                            |
| <110/ ≥110 | 1.05 (0.45-2.47)            | 0.91 (0.46-1.79)            | 0.31 (0.06-1.54)          | 3.44 (0.47-25.1)           |
| <115/ ≥115 | 1.47 (0.67-3.25)            | 1.17 (0.65-2.14)            | 0.66 (0.13-3.20)          | 2.55 (0.79-8.22)           |
| <120/ ≥120 | 1.34 (0.65-2.75)            | 1.02 (0.60-1.71)            | 0.79 (0.20-3.07)          | 1.82 (0.82-4.03)           |
| <125/ ≥125 | 1.58 (0.78-3.17)            | 1.19 (0.72-1.94)            | 1.02 (0.29-3.56)          | 1.94 (1.00-3.76)           |
| <130/ ≥130 | 1.59 (0.78-3.25)            | 1.20 (0.73-1.95)            | 0.45 (0.14-1.51)          | <b>1.87 (1.07-3.26)</b>    |
| <140/ ≥140 | <b>2.78 (1.25-6.17)</b>     | 1.66 (0.96-2.87)            | 0.68 (0.18-2.66)          | 1.67 (1.00-2.77)           |
| <150/ ≥150 | <b>3.83 (1.52-9.64)</b>     | <b>2.36 (1.25-4.47)</b>     | 0.47 (0.06-3.75)          | <b>2.19 (1.26-3.82)</b>    |

**C. Body mass index**

| SBP mmHg    | DM (-)                      |                            | DM (+)                    |                            |
|-------------|-----------------------------|----------------------------|---------------------------|----------------------------|
|             | BMI <24                     | BMI ≥24                    | BMI <24                   | BMI ≥24                    |
|             | (n=169273)<br>(dialysis=65) | (n=72355)<br>(dialysis=48) | (n=6072)<br>(dialysis=20) | (n=11174)<br>(dialysis=56) |
| HR (95% CI) |                             |                            |                           |                            |
| <110/≥110   | 1.07 (0.57-2.04)            | 0.55 (0.23-1.33)           | 1.83 (0.24-14.1)          | 1.00 (0.23-4.00)           |
| <115/≥115   | 1.53 (0.84-2.78)            | 0.73 (0.35-1.53)           | 1.06 (0.30-3.73)          | 2.57 (0.62-10.6)           |
| <120/≥120   | 1.30 (0.76-2.22)            | 0.75 (0.39-1.42)           | 1.88 (0.53-6.60)          | 1.25 (0.57-2.79)           |
| <125/≥125   | 1.35 (0.80-2.29)            | 1.09 (0.59-2.00)           | 1.78 (0.62-5.07)          | 1.56 (0.78-3.11)           |
| <130/≥130   | 1.15 (0.66-2.01)            | 1.36 (0.75-2.46)           | 1.49 (0.59-3.81)          | 1.35 (0.76-2.39)           |
| <140/≥140   | 1.73 (0.90-3.33)            | <b>1.98 (1.07-3.67)</b>    | 1.60 (0.62-4.15)          | 1.32 (0.77-2.27)           |
| <150/≥150   | 1.98 (0.87-4.51)            | <b>3.26 (1.65-6.43)</b>    | 1.81 (0.59-5.59)          | 1.74 (0.95-3.17)           |

Baseline variables for predictors of dialysis adjusted by smoking, medication for hypertension, LDL-C, and HDL-C.

HR: hazard ratio; SBP: systolic blood pressure; BMI: body mass index; LDL-C: low-density lipoprotein cholesterol; HDL-C: high-density lipoprotein cholesterol

(A) Adjusted for age, smoking, medication for hypertension, BMI, LDL-C, HDL-C and SBP (≥110 or ≥115 or ≥120 or ≥125 or ≥130 or ≥140 or ≥150 mmHg). In the DM group, additional adjustments were made for + medication for diabetes. (B) Adjusted for sex, smoking, medication for hypertension, BMI, LDL-C, HDL-C and SBP (≥110 or ≥115 or ≥120 or ≥125 or ≥130 or ≥140 or ≥150 mmHg). In the DM group, additional adjustments were made for + medication for diabetes. (C) Adjusted for age, sex, smoking, medication for hypertension, LDL-C, HDL-C and SBP (≥110 or ≥115 or ≥120 or ≥125 or ≥130 or ≥140 or ≥150 mmHg). In the DM group, additional adjustments were made for + medication for diabetes.

**Table S6-1.** Cox regression analysis of variables for the incidence of dialysis in participants with and without diabetes mellitus (DM)

|           | Total              | DM (-)                            | DM (+)                            |
|-----------|--------------------|-----------------------------------|-----------------------------------|
|           | HR (95% CI)        |                                   |                                   |
| Diabetes  | <b>3.41</b>        |                                   |                                   |
|           | <b>(2.45-4.76)</b> |                                   |                                   |
| SBP mmHg  |                    |                                   |                                   |
| <110/≥110 |                    | 0.98<br>(0.57-1.66)               | 1.37<br>(0.43-4.42)               |
| <115/≥115 |                    | 1.30<br>(0.81-2.11)               | 1.82<br>(0.73-4.55)               |
| <120/≥120 |                    | 1.14<br>(0.75-1.75)               | 1.52<br>(0.77-2.99)               |
| <125/≥125 |                    | 1.34<br>(0.89-2.01)               | 1.72<br>(0.97-3.07)               |
| <130/≥130 |                    | 1.35<br>(0.90-2.02)               | 1.48<br>(0.91-2.41)               |
| <140/≥140 |                    | <b>2.01</b><br><b>(1.28-3.16)</b> | 1.48<br>(0.92-2.38)               |
| <150/≥150 |                    | <b>2.82</b><br><b>(1.67-4.77)</b> | <b>1.87</b><br><b>(1.10-3.18)</b> |

Baseline variables for predictors of dialysis adjusted by age, sex, smoking, medication for hypertension, BMI, LDL-C, and HDL-C.

HR: hazard ratio; SBP: systolic blood pressure; BMI: body mass index; LDL-C: low-density lipoprotein cholesterol; HDL-C: high-density lipoprotein cholesterol

(total) Adjusted for age, sex, smoking, medication for hypertension, BMI, LDL-C, HDL-C, and DM; (non-DM) Adjusted for age, sex, smoking, medication for hypertension, BMI, LDL-C, HDL-C, and SBP (≥110 or ≥115 or ≥120 or ≥125 or ≥130 or ≥140 or ≥150 mmHg); (DM) Adjusted for age, sex, smoking, medication for hypertension, medication for diabetes, BMI, LDL-C, HDL-C, and SBP (≥110 or ≥115 or ≥120 or ≥125 or ≥130 or ≥140 or ≥150 mmHg)

**Table S6-2.** Cox regression analysis of variables for the incidence of dialysis in participants with and without diabetes mellitus (DM)

|           | Total                             | DM (-)                            | DM (+)                            |
|-----------|-----------------------------------|-----------------------------------|-----------------------------------|
|           | HR (95% CI)                       |                                   |                                   |
| Diabetes  | <b>2.55</b><br><b>(1.63-3.99)</b> |                                   |                                   |
| SBP mmHg  |                                   |                                   |                                   |
| <110/≥110 |                                   | 0.97<br>(0.57-1.66)               | 0.87<br>(0.27-2.84)               |
| <115/≥115 |                                   | 1.30<br>(0.80-2.11)               | 1.21<br>(0.48-3.09)               |
| <120/≥120 |                                   | 1.14<br>(0.75-1.75)               | 1.33<br>(0.62-2.84)               |
| <125/≥125 |                                   | 1.34<br>(0.89-2.02)               | 1.67<br>(0.85-3.27)               |
| <130/≥130 |                                   | 1.35<br>(0.90-2.04)               | 1.32<br>(0.75-2.33)               |
| <140/≥140 |                                   | <b>2.03</b><br><b>(1.29-3.20)</b> | 1.58<br>(0.91-2.75)               |
| <150/≥150 |                                   | <b>2.85</b><br><b>(1.68-4.82)</b> | <b>2.05</b><br><b>(1.11-3.78)</b> |

Baseline variables for predictors of dialysis adjusted by age, sex, smoking, medication for hypertension, BMI, LDL-C, and HDL-C.

HR: hazard ratio; SBP: systolic blood pressure; BMI: body mass index; LDL-C: low-density lipoprotein cholesterol; HDL-C: high-density lipoprotein cholesterol; TG: triglycerides; FPG: fasting plasma glucose

(total) Adjusted for age, sex, smoking, medication for hypertension, BMI, LDL-C, HDL-C, TG, FPG, and DM; (non-DM) Adjusted for age, sex, smoking, medication for hypertension, BMI, LDL-C, HDL-C, TG, FPG, and SBP (≥110 or ≥115 or ≥120 or ≥125 or ≥130 or ≥140 or ≥150 mmHg); (DM) Adjusted for age, sex, smoking, medication for hypertension, medication for diabetes, BMI, LDL-C, HDL-C, TG, FPG, and SBP (≥110 or ≥115 or ≥120 or ≥125 or ≥130 or ≥140 or ≥150 mmHg)

**Table S7-1.** HRs for initiation of dialysis according to combinations of DM and SBP

| SBP mmHg | DM (-)                  | DM (+)                  |
|----------|-------------------------|-------------------------|
|          | HR (95% CI)             |                         |
| ≤119     | 1.00 (Ref.)             | 1.00 (Ref.)             |
| 120-129  | 0.98 (0.58-1.64)        | 1.23 (0.56-2.72)        |
| 130-139  | 0.94 (0.52-1.67)        | 1.46 (0.68-3.16)        |
| 140-149  | 1.28 (0.63-2.61)        | 1.37 (0.57-3.28)        |
| ≥150     | <b>2.87 (1.55-5.32)</b> | <b>2.41 (1.09-5.33)</b> |
| ≤119     | 1.00 (Ref.)             | <b>3.01 (1.45-6.25)</b> |
| 120-129  | 0.97 (0.58-1.62)        | <b>3.70 (1.96-7.00)</b> |
| 130-139  | 0.95 (0.54-1.68)        | <b>4.26 (2.32-7.81)</b> |
| 140-149  | 1.31 (0.65-2.65)        | <b>3.94 (1.89-8.19)</b> |
| ≥150     | <b>3.00 (1.65-5.44)</b> | <b>6.88 (3.66-12.9)</b> |

HR for initiation of dialysis compared with the combination of DM (-) and SBP ≤119 mmHg /DM (+) and SBP ≤119 mmHg as the reference group. Baseline variables as predictors for dialysis adjusted by age, sex, smoking, medication for hypertension, BMI, LDL-C, and HDL-C. In the DM group, additional adjustments were made for + medication for diabetes.

HR: hazard ratio; DM: diabetes mellitus; SBP: systolic blood pressure; BMI: body mass index; LDL-C: low-density lipoprotein cholesterol; and HDL-C: high-density lipoprotein cholesterol



**Table S7-2.** HRs for initiation of dialysis according to combinations of DM and SBP

| SBP mmHg | DM (-)                  | DM (+)                  |
|----------|-------------------------|-------------------------|
|          | HR (95% CI)             |                         |
| ≤119     | 1.00 (Ref.)             | 1.00 (Ref.)             |
| 120-129  | 0.98 (0.58-1.65)        | 1.14 (0.47-2.80)        |
| 130-139  | 0.94 (0.53-1.69)        | 1.13 (0.46-2.75)        |
| 140-149  | 1.30 (0.63-2.66)        | 1.21 (0.45-3.30)        |
| ≥150     | <b>2.91 (1.56-5.43)</b> | 2.30 (0.94-5.64)        |
| ≤119     | 1.00 (Ref.)             | <b>2.33 (1.01-5.34)</b> |
| 120-129  | 0.93 (0.56-1.55)        | <b>2.77(1.31-5.84)</b>  |
| 130-139  | 0.88 (0.50-1.56)        | <b>2.71 (1.29-5.69)</b> |
| 140-149  | 1.19 (0.59-2.40)        | <b>2.94 (1.23-7.01)</b> |
| ≥150     | <b>2.69 (1.47-4.90)</b> | <b>5.67 (2.67-12.0)</b> |

HR for initiation of dialysis compared with the combination of DM (-) and SBP ≤119 mmHg /DM (+) and SBP ≤119 mmHg as the reference group. Baseline variables as predictors for dialysis adjusted by age, sex, smoking, medication for hypertension, BMI, LDL-C, HDL-C, TG, and FPG. In the DM group, additional adjustments were made for + medication for diabetes.

HR: hazard ratio; DM: diabetes mellitus; SBP: systolic blood pressure; BMI: body mass index; LDL-C: low-density lipoprotein cholesterol; HDL-C: high-density lipoprotein cholesterol; TG: triglycerides; and FPG: fasting plasma glucose

Figure S1

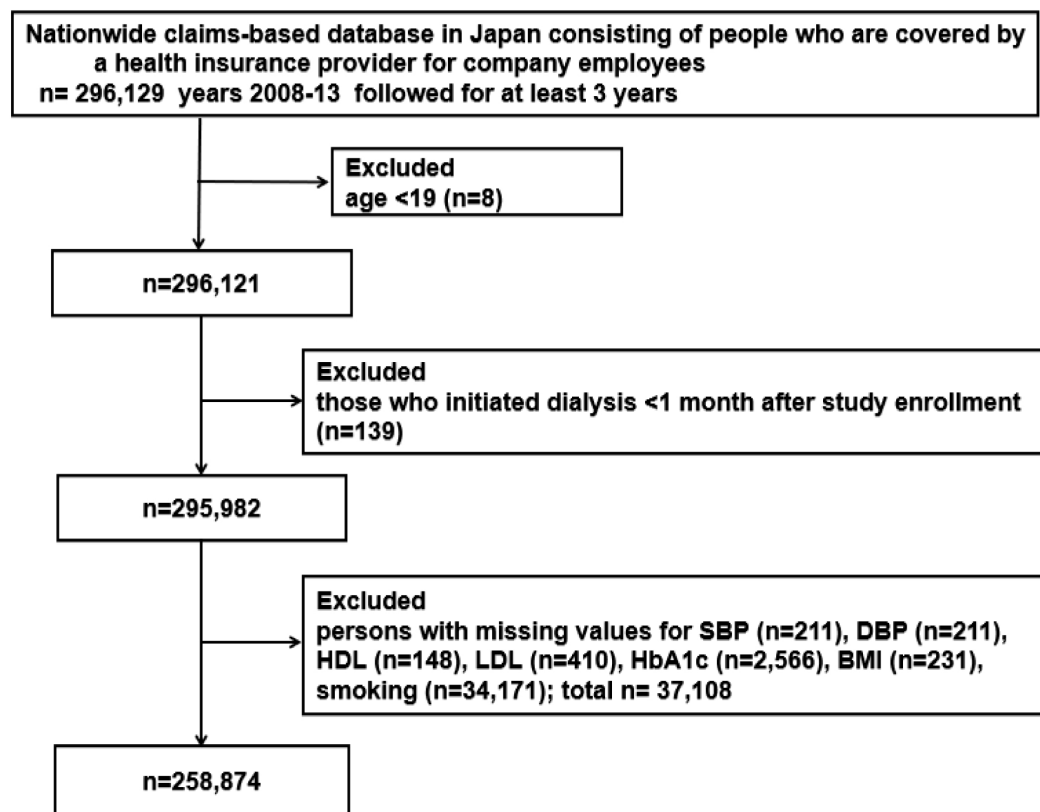

### Inclusion-exclusion criteria and sample size

Figure S2

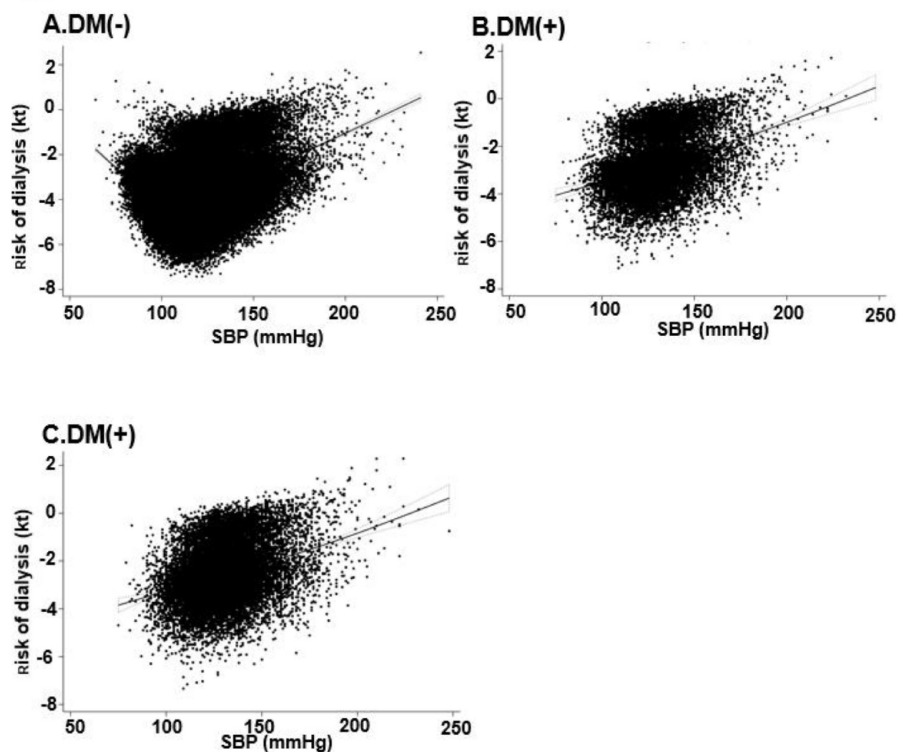

### Cubic regression spline curves for the risk of dialysis according to SBP in participants with and without DM

Three knots were set at the 25, 50, and 75 percentiles of SBP.

(A) Knots existed at 108, 118, and 128 mmHg of SBP. Risk of dialysis according to SBP adjusted by age, sex, BMI, smoking, LDL cholesterol, HDL cholesterol, and medication for hypertension in participants without DM; (B) Knots existed at 120, 129, and 140 mmHg of SBP. Risk of dialysis according to SBP adjusted by age, sex, BMI, smoking, LDL cholesterol, HDL cholesterol, and medication for hypertension in participants with DM; and (C) Knots existed at 120, 129, and 140 mmHg of SBP. Risk of dialysis according to SBP adjusted by age, sex, BMI, smoking, LDL cholesterol, HDL cholesterol, medication for hypertension, and medication for diabetes in participants with DM. BMI: body mass index; SBP: systolic blood pressure; LDL cholesterol: low-density lipoprotein cholesterol; HDL cholesterol: high-density lipoprotein cholesterol
